# Supplementary material for: Highly Efficient Reproducible Perovskite Solar Cells Prepared by Low-Temperature Processing
Source: MDPI journal article supplement (doi:10.3390/molecules21040542), 2016-04-23
Supplement: s1 [file s1]

# Supplementary Material: Highly Efficient Reproducible Perovskite Solar Cells Prepared by Low-Temperature Processing

Hao Hu, Ka Kan Wong, Tom Kollok, Fabian Hanusch, Sebastian Polarz, Pablo Docampo and Lukas Schmidt-Mende

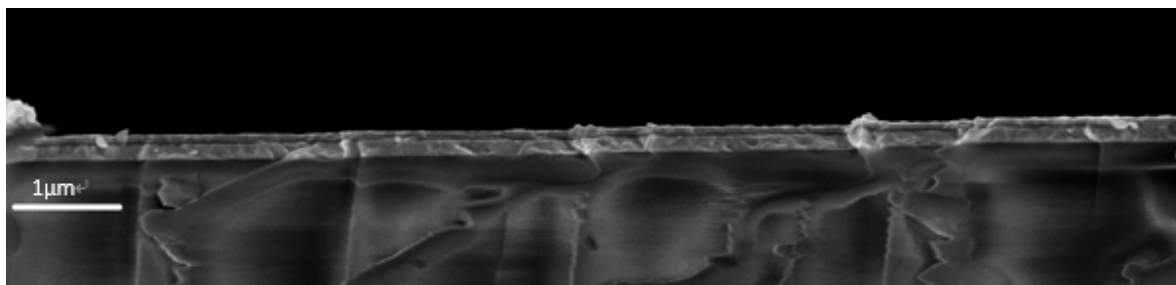

Figure S1. Ultraflat perovskite film with around 70 nm thickness deposited with VAOS method.

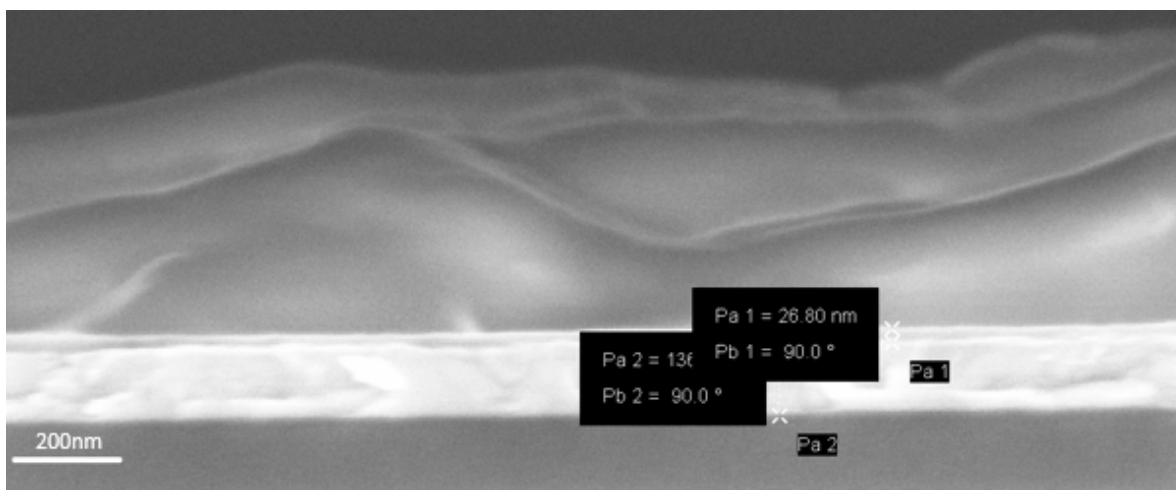

Figure S2. Cross-section SEM graph of PEDOT:PSS film (PEG deposited on top for contrast).
